# Supplementary material for: PKA drives an increase in AMPA receptor unitary conductance during LTP in the hippocampus
Source: PubMed Central journal article supplement (PMC7814032; doi:10.1038/s41467-020-20523-3), 2021-01-18
Supplement: 41467_2020_20523_MOESM1_ESM.pdf [file 41467_2020_20523_MOESM1_ESM.pdf]

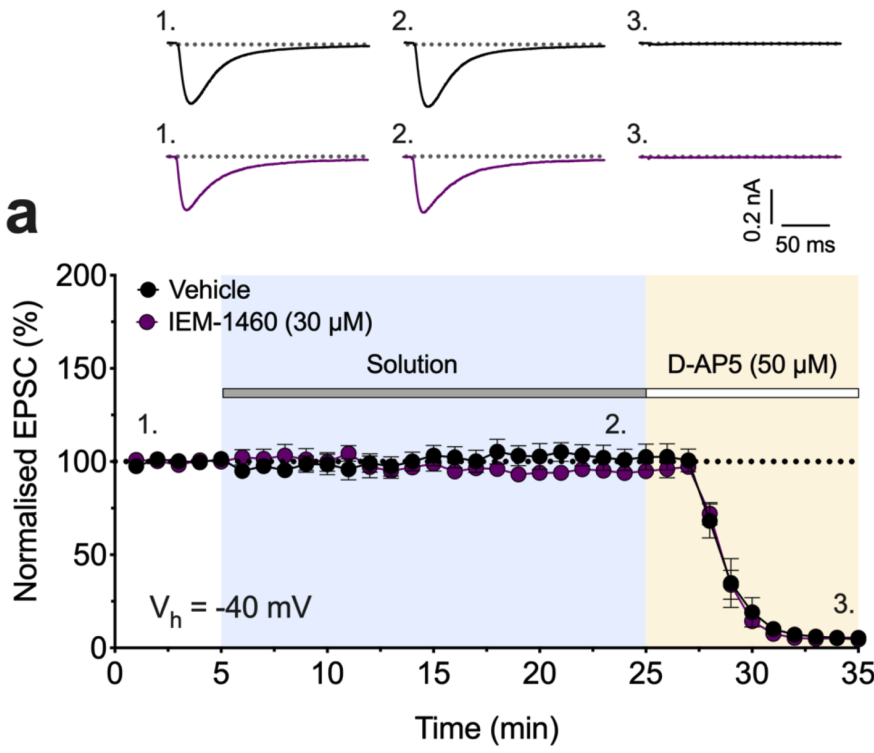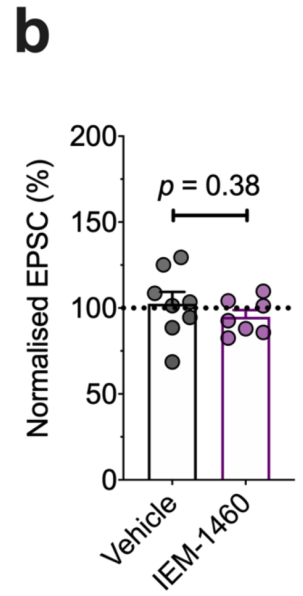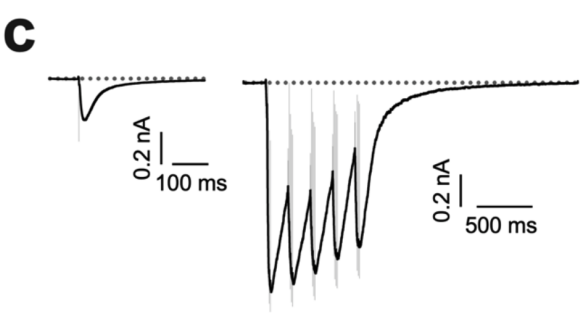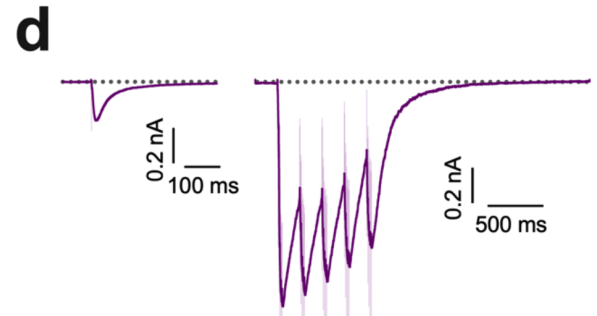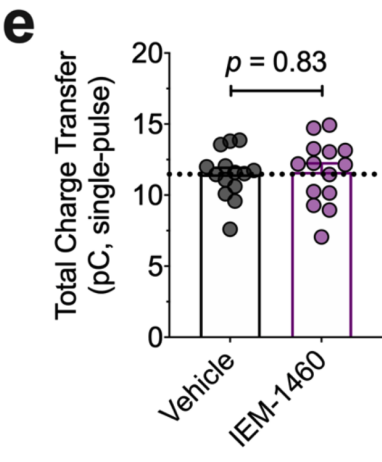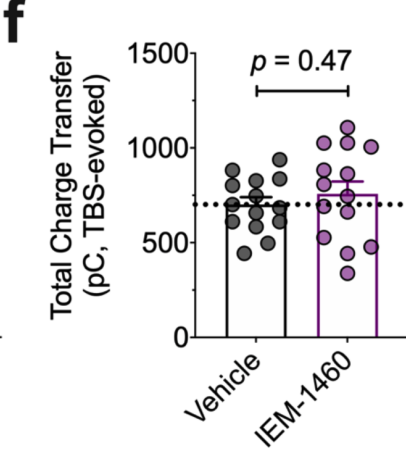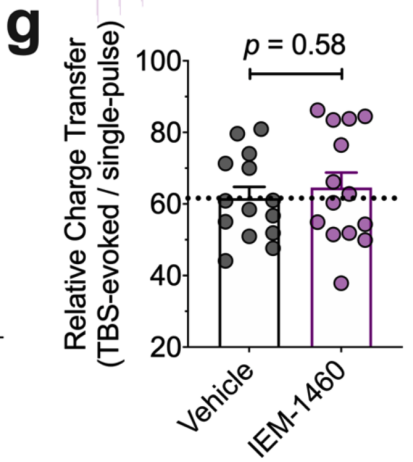

**Supplementary Figure 1. Lack of effect for IEM on NMDAR-mediated currents.** **a**, IEM-1460 (30  $\mu\text{M}$ ) was applied to slices while recording synaptic currents (inset) in the presence of picrotoxin (50  $\mu\text{M}$ ) and NBQX (10  $\mu\text{M}$ ) at a holding potential of -40 mV (mean  $\pm$  SEM,  $n = 7$  neurons from 6 animals for IEM and 8 neurons from 6 animals for vehicle control). Subsequent application of D-AP5 (50  $\mu\text{M}$ ) confirmed that the EPSCs were mediated by NMDARs. **b**, No significant difference was found after 20 min of vehicle control vs. IEM-1460 application ( $t_{13} = 0.9158$ ,  $p = 0.3764$ , two-sided unpaired Student's  $t$ -test). **c-d**, Representative traces for currents evoked by single-pulse and TBS (i.e. 25 stimuli) for vehicle (**c**) and IEM-1460 (**d**) treated slices. Thin lines, original traces; thick lines, low-pass filtered at 200 Hz. **e-g**, Quantification for total charge transfer during single-pulse evoked currents ( $t_{26} = 0.2191$ ,  $p = 0.8283$ , two-sided unpaired Student's  $t$ -test) (**e**), TBS-evoked currents ( $t_{26} = 0.7341$ ,  $p = 0.4694$ , two-sided unpaired Student's  $t$ -test) (**f**), and the ratio of these two measurements ( $t_{26} = 0.5637$ ,  $p = 0.5778$ , two-sided unpaired Student's  $t$ -test) (**g**) for vehicle ( $n = 14$  neurons from 8 animals) and IEM-1460 ( $n = 14$  neurons from 8 animals) treated groups. Data are presented as mean  $\pm$  SEM. Source data are provided as a Source Data file.

**Supplementary Table 1. Summary of EPSC properties for the various experimental protocols and conditions.**

| Protocol                       | $\gamma$ (pS) |                            | EPSC (%)                | $\tau_{\text{rise}}$ (ms) |             | $\tau_{\text{decay}}$ (ms) |                            | N     |
|--------------------------------|---------------|----------------------------|-------------------------|---------------------------|-------------|----------------------------|----------------------------|-------|
| Compressed TBS                 | 5.09 ± 0.32   | 5.34 ± 0.37                | 212 ± 11 <sup>***</sup> | 1.23 ± 0.06               | 1.20 ± 0.07 | 7.17 ± 0.19                | 7.07 ± 0.23                | 22/15 |
| Spaced TBS                     | 6.91 ± 0.44   | 8.40 ± 0.44 <sup>**</sup>  | 177 ± 9 <sup>***</sup>  | 1.16 ± 0.06               | 1.15 ± 0.05 | 7.09 ± 0.19                | 6.75 ± 0.20 <sup>**</sup>  | 23/17 |
| wTBS with rolipram             | 4.86 ± 0.43   | 8.02 ± 0.58 <sup>***</sup> | 234 ± 14 <sup>***</sup> | 1.22 ± 0.06               | 1.16 ± 0.05 | 7.19 ± 0.20                | 6.68 ± 0.15 <sup>***</sup> | 21/15 |
| wTBS with PKA C $\alpha$       | 5.15 ± 0.51   | 7.79 ± 0.80 <sup>***</sup> | 276 ± 19 <sup>***</sup> | 1.02 ± 0.06               | 1.02 ± 0.04 | 6.75 ± 0.22                | 6.41 ± 0.23 <sup>*</sup>   | 17/13 |
| wTBS with PKA C $\alpha$ + IEM | 4.29 ± 0.51   | 4.32 ± 0.54                | 202 ± 16 <sup>***</sup> | 1.00 ± 0.07               | 0.99 ± 0.07 | 6.73 ± 0.25                | 6.70 ± 0.26                | 16/13 |
| HI-CaMKII                      | 4.57 ± .053   | 4.57 ± 0.52                | 112 ± 7                 | 1.01 ± 0.06               | 1.01 ± 0.07 | 6.99 ± 0.34                | 6.96 ± 0.25                | 14/11 |
| CaMKII                         | 4.71 ± 0.57   | 4.32 ± .046                | 169 ± 15 <sup>***</sup> | 0.95 ± 0.05               | 0.93 ± 0.04 | 6.82 ± 0.30                | 6.75 ± 0.29                | 15/12 |
| CaMKII + PKA C $\alpha$        | 4.64 ± 0.39   | 6.48 ± 0.42 <sup>***</sup> | 178 ± 10 <sup>***</sup> | 1.05 ± 0.07               | 1.03 ± 0.08 | 7.06 ± 0.26                | 6.69 ± 0.19 <sup>*</sup>   | 18/15 |
| CaMKII + PKA C $\alpha$ + IEM  | 4.26 ± 0.33   | 4.13 ± 0.40                | 128 ± 9 <sup>*</sup>    | 1.01 ± 0.04               | 1.00 ± 0.04 | 6.91 ± 0.20                | 6.87 ± 0.22                | 20/15 |
| HI-CaMKII + PKA C $\alpha$     | 4.24 ± 0.35   | 4.22 ± 0.40                | 112 ± 9                 | 1.01 ± 0.03               | 0.97 ± 0.03 | 7.07 ± 0.27                | 7.05 ± 0.26                | 16/14 |
| CaMKII + IEM                   | 4.07 ± 0.39   | 4.04 ± 0.66                | 165 ± 17 <sup>**</sup>  | 0.97 ± 0.03               | 0.98 ± 0.03 | 6.75 ± 0.22                | 6.78 ± 0.34                | 8/8   |

\* $p < 0.05$ , \*\* $p < 0.01$ , \*\*\* $p < 0.001$  for baseline vs. LTP in two-sided paired Student's  $t$ -test.
